# Supplementary material for: Prospective community programme versus parent-driven care to prevent respiratory morbidity in children following hospitalisation with severe bronchiolitis or pneumonia
Source: HighWire-hosted journal article supplement (doi:10.1136/thoraxjnl-2019-213142), 2020-02-24
Supplement: thoraxjnl-2019-213142supp001_data_supplement.pdf [file thoraxjnl-2019-213142supp001_data_supplement.pdf]

Supplementary Table 1

| Characteristics                                                  | Loss to follow-up            |                   |                   |
|------------------------------------------------------------------|------------------------------|-------------------|-------------------|
|                                                                  | No, n=321                    | Yes, n=79         |                   |
| Age (months)                                                     |                              |                   |                   |
|                                                                  | Median (Interquartile range) | 7.0 (2.8, 12.1)   | 5.5 (2.2, 11.2)   |
| Pneumonia                                                        | 186 (57.9%)                  | 43 (54.4%)        |                   |
| Bronchiolitis                                                    | 135 (42.1%)                  | 36 (45.6%)        |                   |
| Gender                                                           |                              |                   |                   |
|                                                                  | Male                         | 181 (56.4%)       | 49 (62.0%)        |
|                                                                  | Female                       | 140 (43.6%)       | 30 (38.0%)        |
| Ethnicity                                                        |                              |                   |                   |
|                                                                  | Pasifika                     | 199 (62.0%)       | 48 (60.8%)        |
|                                                                  | Māori                        | 78 (24.3%)        | 25 (31.6%)        |
|                                                                  | European                     | 32 (9.9%)         | 5 (6.3%)          |
|                                                                  | Other                        | 12 (3.7%)         | 1 (1.3%)          |
| Weight on arrival at hospital (EC) [Kg]                          |                              |                   |                   |
|                                                                  | Median (Interquartile range) | 8.7 (6.2, 10.1)   | 7.9 (5.4, 10.6)   |
| Duration of admission (in days)                                  |                              |                   |                   |
|                                                                  | Median (Interquartile range) | 3 (2, 5)          | 3 (2, 5)          |
| Admitted >=5 days                                                | 12 (3.7%)                    | 3 (3.8%)          |                   |
| Oxygen >=36 hour                                                 | 94 (29.3%)                   | 23 (29.1%)        |                   |
| Admitted to ITU/CPAP                                             | 33 (10.3%)                   | 10 (12.7%)        |                   |
| Number admitted in winter months                                 |                              |                   |                   |
|                                                                  | June/July/August             | 196 (61.1%)       | 44 (55.7%)        |
|                                                                  | June/July/August/September   | 249 (77.6%)       | 59 (74.7%)        |
| Positive PCR on Nasopharyngeal Aspirate                          | 300 (93.4%)                  | 76 (96.2%)        |                   |
| More than one virus                                              | 110 (34.3%)                  | 40 (50.6%)        |                   |
| RSV                                                              | 168 (52.3%)                  | 45 (56.9%)        |                   |
| Positive bacterial culture                                       | 11 (3.4%)                    | 4 (5.1%)          |                   |
| Previous admission with respiratory illness (presentation to EC) | 118 (36.8%)                  | 24 (30.4%)        |                   |
| Overcrowding index                                               |                              |                   |                   |
|                                                                  | Median (Interquartile range) | 0.50 (0.33, 0.67) | 0.50 (0.33, 0.78) |
| Number of children                                               |                              |                   |                   |
|                                                                  | 1                            | 4 (5.1%)          | 47 (14.6%)        |
|                                                                  | 2                            | 21 (26.6%)        | 74 (23.1%)        |
|                                                                  | 3                            | 17 (21.5%)        | 77 (24.0%)        |
|                                                                  | 4                            | 16 (20.3%)        | 45 (14.0%)        |
|                                                                  | ≥5                           | 21 (26.6%)        | 78 (24.3%)        |
| Number of children under 5 years                                 |                              |                   |                   |
|                                                                  | 1                            | 93 (29.0%)        | 25 (31.6%)        |
|                                                                  | 2                            | 140 (43.6%)       | 27 (34.2%)        |
|                                                                  | 3                            | 66 (20.6%)        | 13 (16.5%)        |
|                                                                  | ≥4                           | 22 (6.9%)         | 14 (17.7%)        |
| Breastfeeding                                                    | 283 (88.2%)                  | 69 (87.3%)        |                   |

|                                      |                              |             |
|--------------------------------------|------------------------------|-------------|
| Pregnancy smoke exposure             | 103 (32.1%)                  | 22 (27.8%)  |
| Household smoke exposure             | 181 (56.7%)                  | 49 (62.0%)  |
| Immunizations                        |                              |             |
| Yes                                  | 50 (63.3%)                   | 226 (70.4%) |
| Too young                            | 13 (16.5%)                   | 44 (13.7%)  |
| IF no,                               |                              |             |
| Due for next immunisations / Nil     | 48 (14.9%)                   | 15 (18.9%)  |
| Family history asthma (first degree) | 208 (64.8%)                  | 54 (68.4%)  |
| NZ dep index                         |                              |             |
|                                      | Median (Interquartile range) | 10 (9, 10)  |
|                                      |                              | 10 (9, 10)  |
